# Supplementary material for: Exploring the Potential Energy Surface of Medium-Sized Aromatic Polycyclic Systems with Embedded Planar Tetracoordinate Carbons: A Guided Approach
Source: MDPI journal article supplement (doi:10.3390/chemistry5030105), 2023-07-11
Supplement: s1 [file s1]

# Exploring the Potential Energy Surface of Medium-Sized Aromatic Polycyclic Systems with Embedded Planar Tetracoordinate Carbons: A Guided Approach

Diego Inostroza <sup>1,2</sup>, Luis Leyva-Parra <sup>1,2</sup>, Osvaldo Yañez <sup>3</sup>, Andrew L. Cooksy <sup>4</sup>, Venkatesan S. Thimmakondur <sup>4,\*</sup> and William Tiznado <sup>1,\*</sup>

*1 Centro de Química Teórica & Computacional (CQT&C), Departamento de Ciencias Químicas, Facultad de Ciencias Exactas, Universidad Andrés Bello, Avenida República 275, Santiago 8370146, Chile; dinostro92@gmail.com (D.I.); l.leyvaparra@uandresbello.edu (L.L.-P.)*

*2 Programa de Doctorado en Fisicoquímica Molecular, Facultad de Ciencias Exactas, Universidad Andrés Bello, Avenida República 275, Santiago 8370146, Chile*

*3 Núcleo de Investigación de Data Science, Facultad de Ingeniería y Negocios, Universidad de las Américas, Santiago 7500000, Chile; oyanez@udla.cl*

*4 Department of Chemistry and Biochemistry, San Diego State University, San Diego, CA 92182-1030, USA; acoosy@sdsu.edu*

*\*Correspondence: vthimmakondusamy@sdsu.edu (V.S.T.); wtiznado@unab.cl (W.T.)*

**Figures S1.** Minimum energy isomers of  $\text{Si}_8\text{C}_{22}$  with their respective point group symmetries and spectroscopic states. Relative energies are shown in  $\text{kcal}\cdot\text{mol}^{-1}$  at PBE0-D3/def2-TZVP levels including zero-point energy (ZPE) corrections. To facilitate the connection of the structures with their Cartesian coordinates (at end of the ESI), a number-letter label was assigned to each structure.

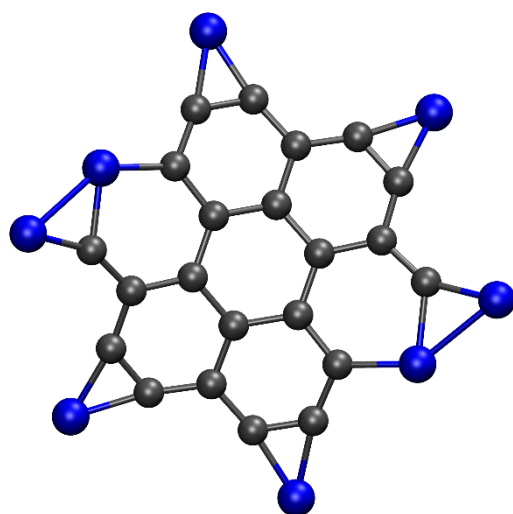

1a.  $C_2 (^1A)$   
0.0

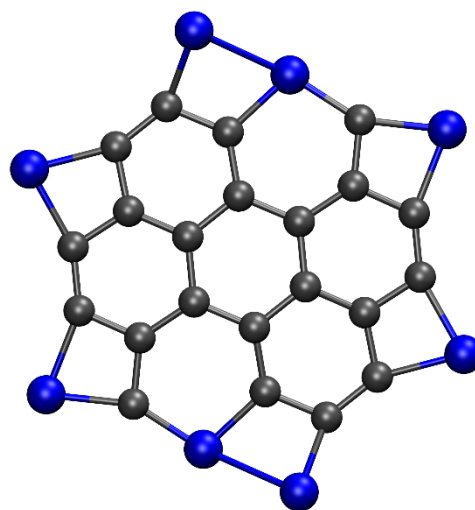

1b.  $C_2 (^1A)$   
13.8

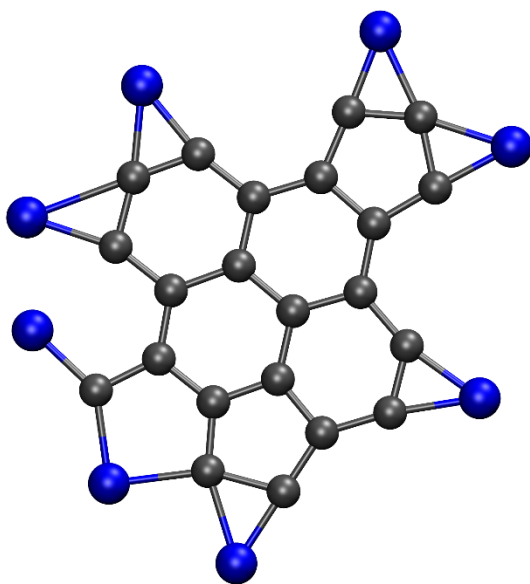

1c.  $C_s (^1A')$   
20.0

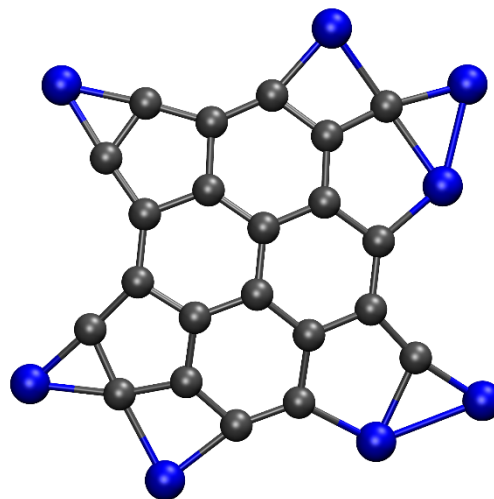

1d.  $C_1 (^1A)$   
22.2

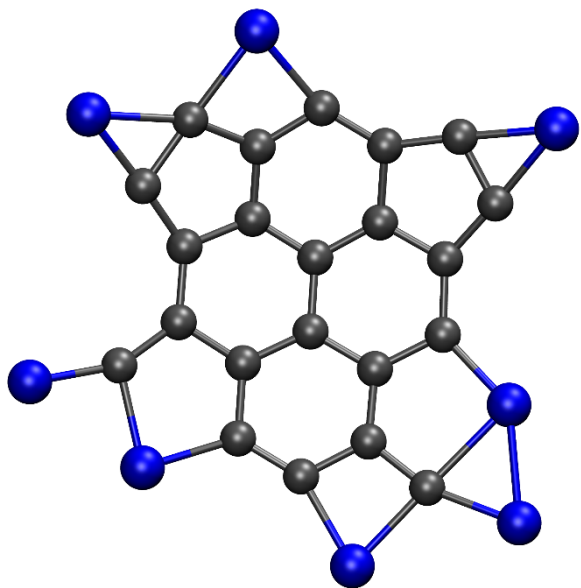

1e.  $C_1(^1A)$   
22.6

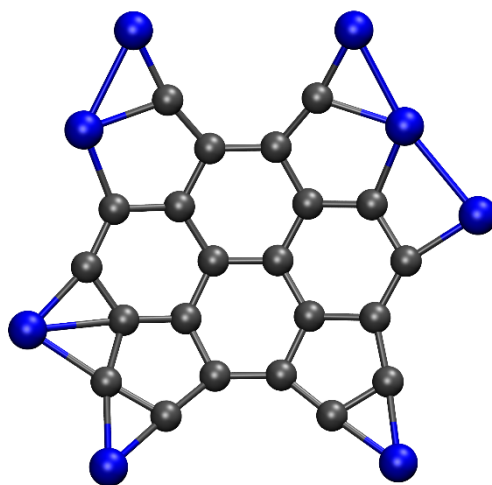

1f.  $C_1(^1A)$   
22.2

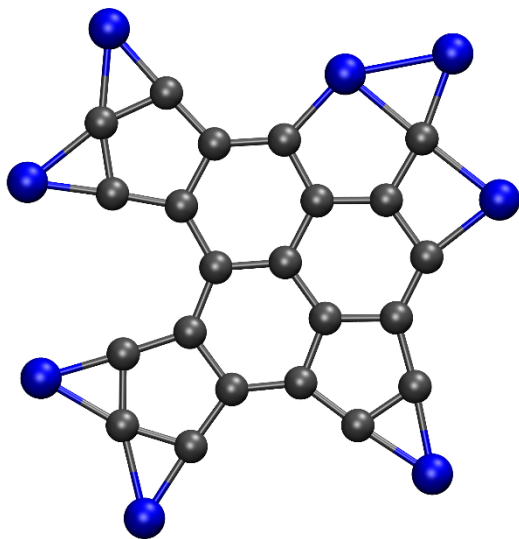

1g.  $C_s(^1A')$   
24.4

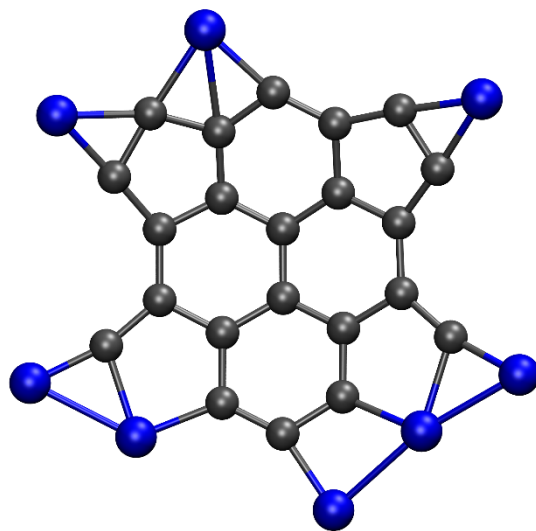

1h.  $C_1(^1A)$   
24.9

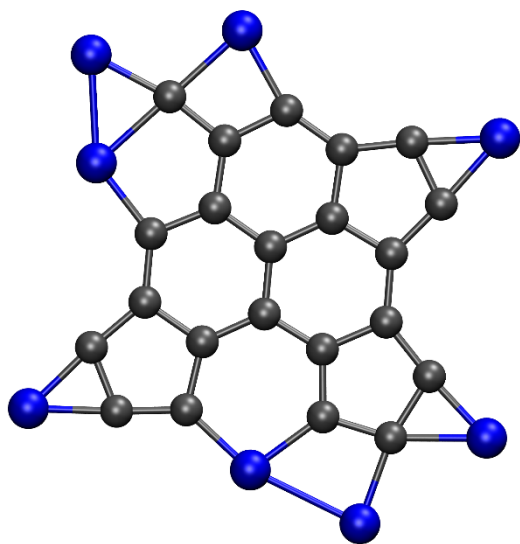

1i.  $C_1(^1A)$   
26.4

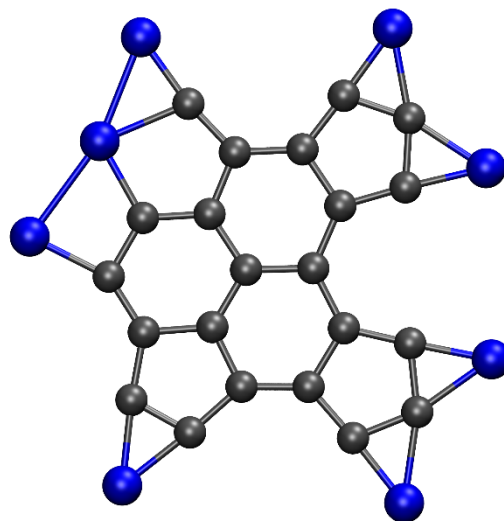

1j.  $C_s(^1A')$   
27.2

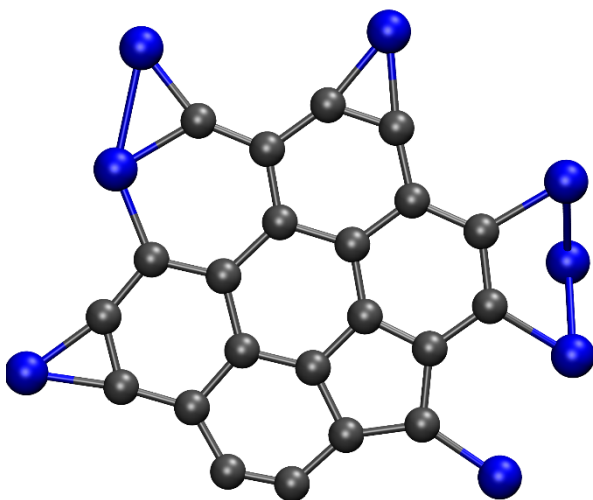

1k.  $C_1(^1A)$   
28.3

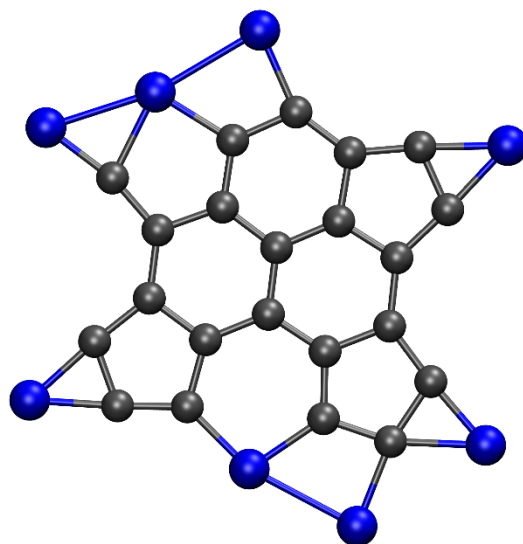

1l.  $C_1(^1A)$   
28.7

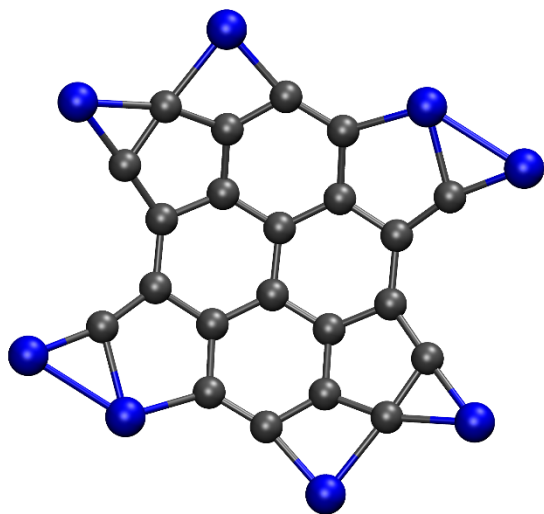

1m.  $C_1(^1A)$   
29.8

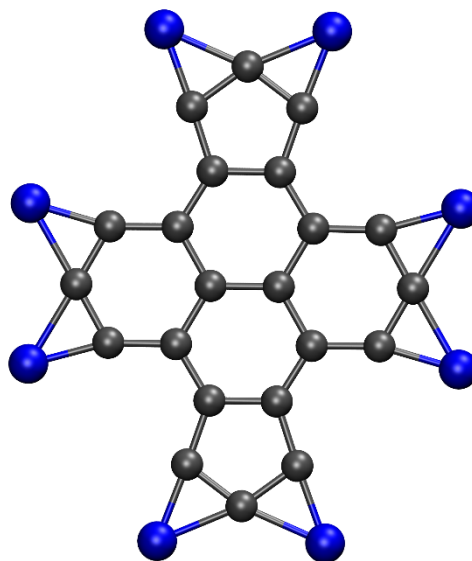

1n.  $D_{2h}(^1A_g)$   
30.2

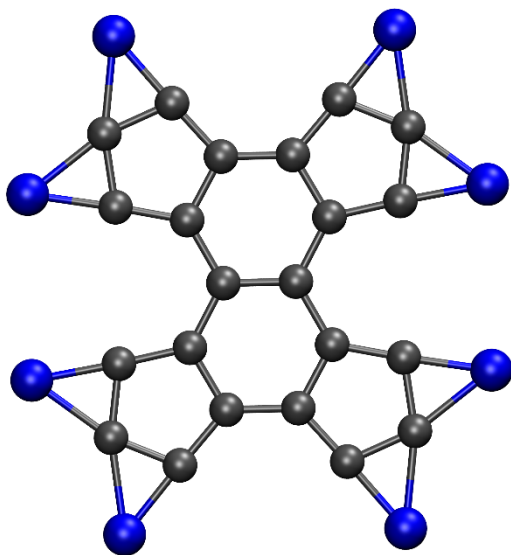

1o.  $D_{2h}(^1A_g)$   
41.7

**Figures S2.** Vector plots visualization of the current density in diverse planes of the  $\text{Si}_3\text{C}_5$ ,  $\text{Si}_2\text{C}_6\text{H}_3^+$  and  $\text{C}_{22}\text{Si}_8$  cluster. Diatropic currents are assumed to circle clockwise.

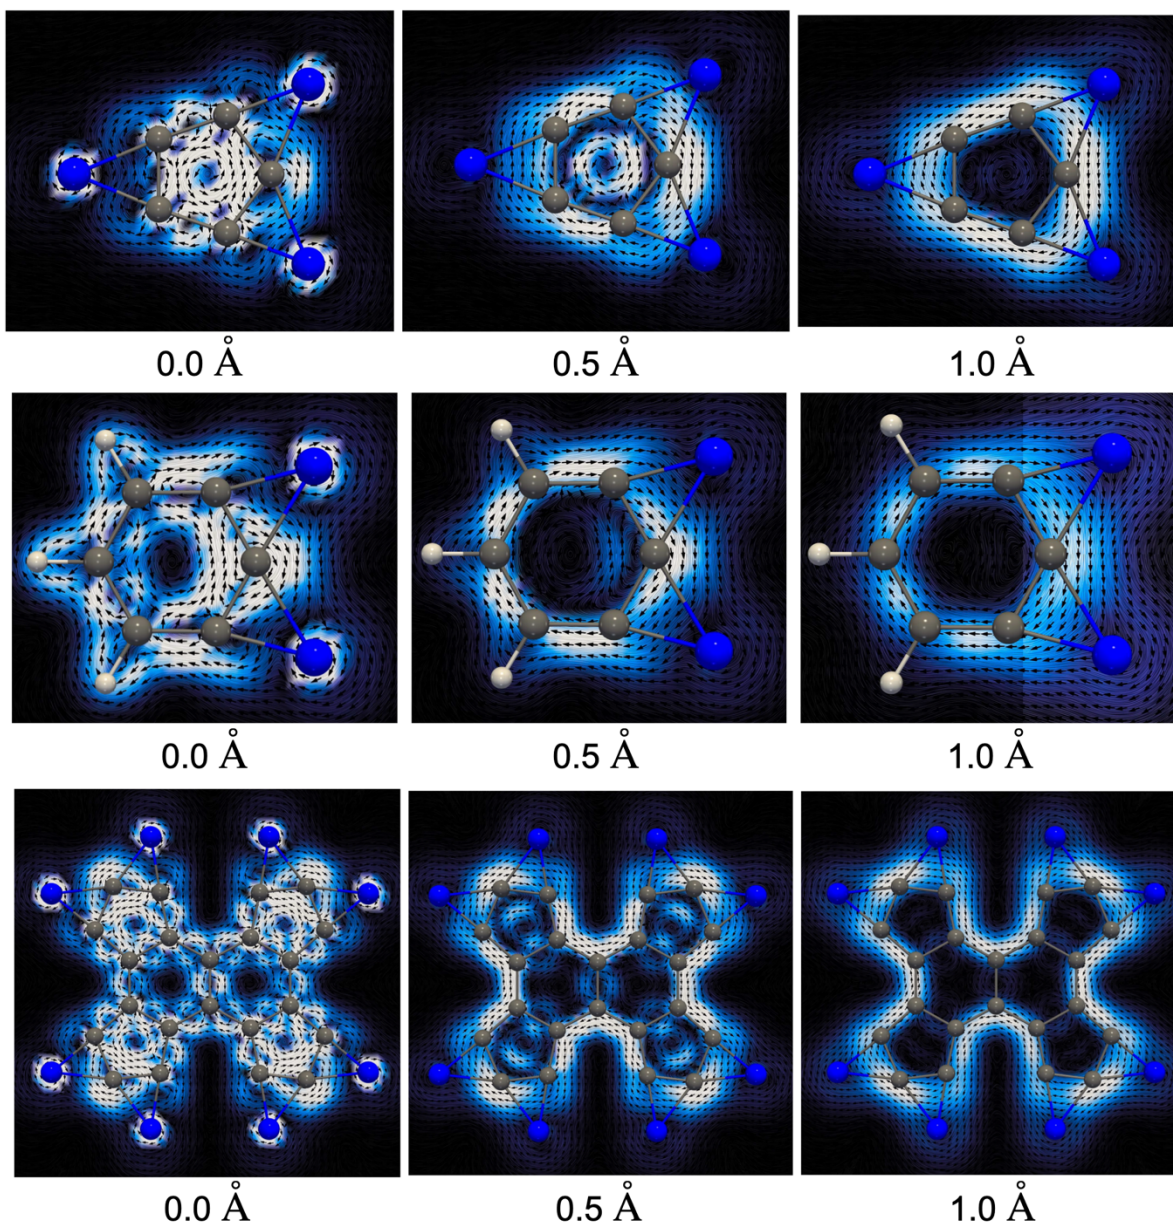



**Figures S3.** Top view of integration planes considered to average the profile RCS for  $\text{Si}_3\text{C}_5$ ,  $\text{Si}_2\text{C}_6\text{H}_3^+$  and  $\text{Si}_8\text{C}_{22}$  cluster (up) and the RCS profiles along the different integration planes (down).

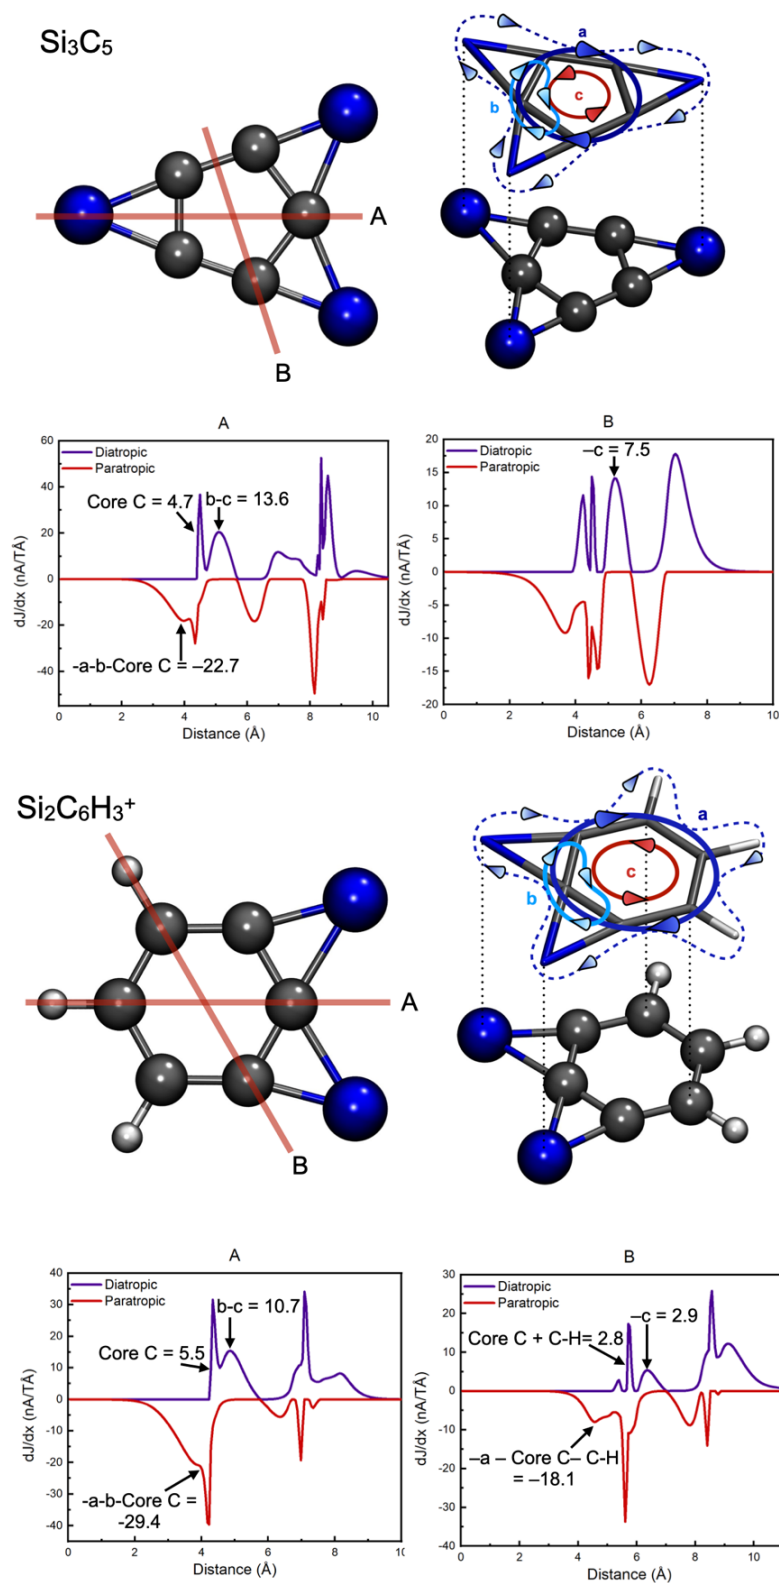

$\text{Si}_8\text{C}_{22}$

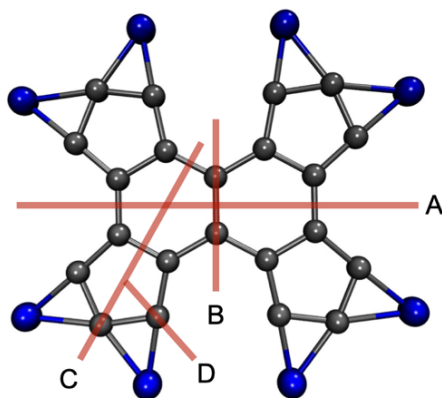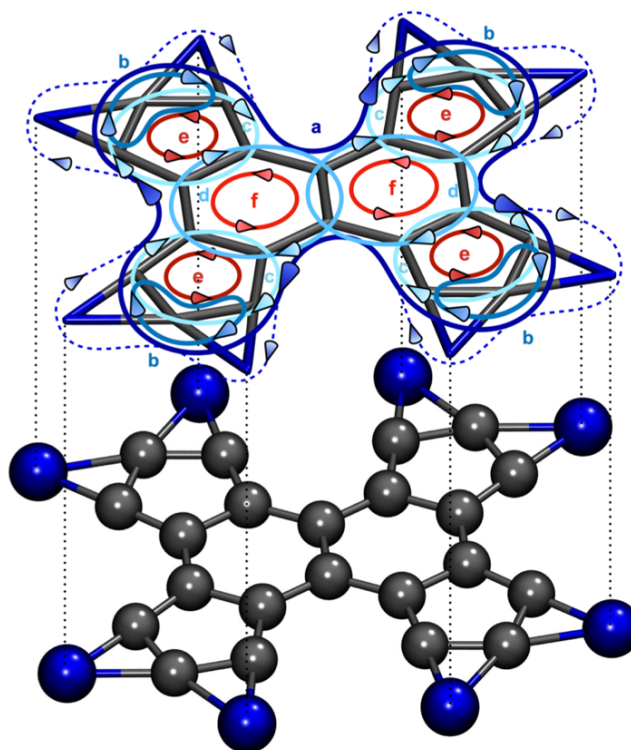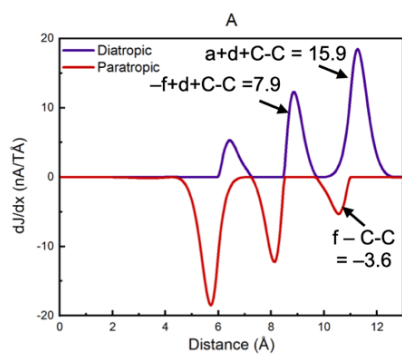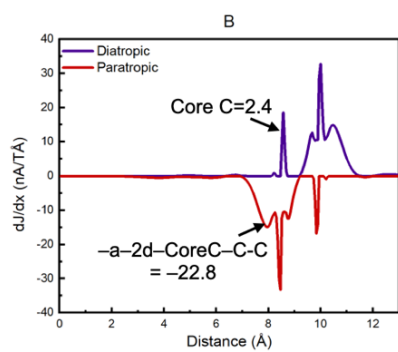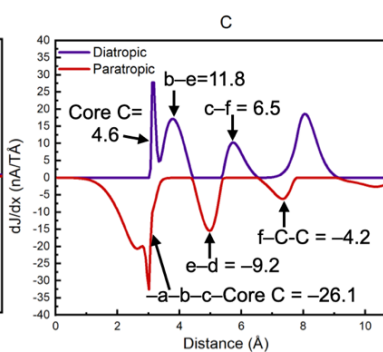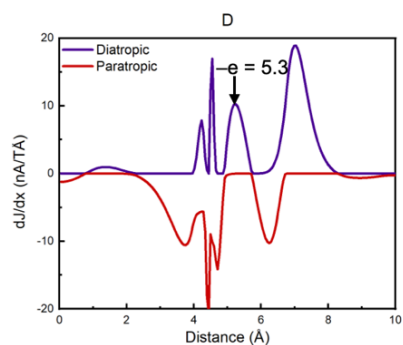



**Figures S4.** Bond length in (black), natural charges (red and blue) and Wiberg bond indices (green) for  $\text{Si}_8\text{C}_{22}$  at the PBE0-D3/Def2-TZVP level of theory.

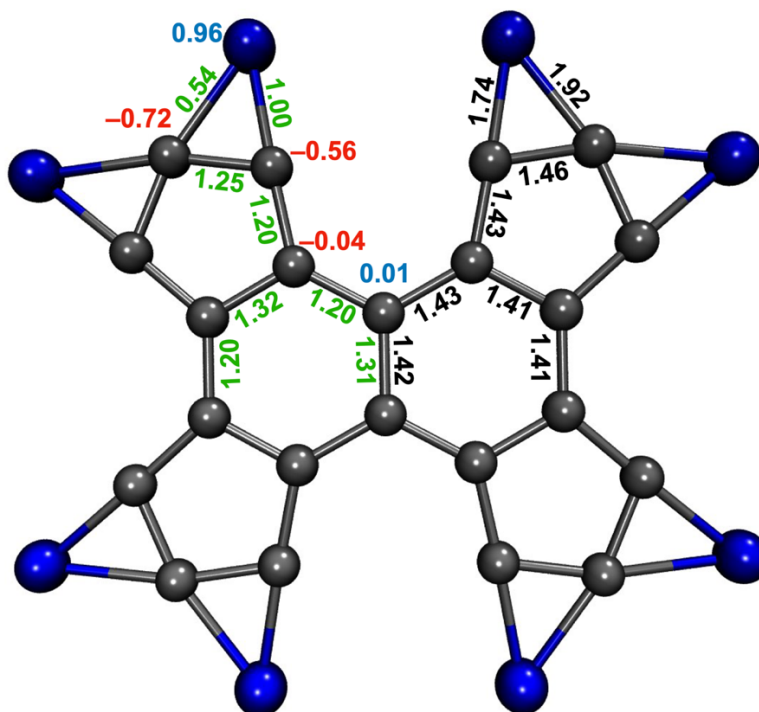

**Table S1.** Cartesian coordinates of the  $\text{Li}_4\text{C}_{22}\text{Si}_8$  and  $\text{Si}_8\text{C}_{22}$  structures with their label for easier identification.

| $\text{Li}_4\text{C}_{22}\text{Si}_8$ |              |              |              |    |              |              |              |
|---------------------------------------|--------------|--------------|--------------|----|--------------|--------------|--------------|
| 6                                     | 1.262087000  | 0.090083000  | 1.408315000  |    |              |              |              |
| 6                                     | 2.511255000  | 0.068297000  | 0.711351000  |    |              |              |              |
| 6                                     | 2.511255000  | -0.068297000 | -0.711351000 |    |              |              |              |
| 6                                     | 1.262087000  | -0.090083000 | -1.408315000 |    |              |              |              |
| 6                                     | 0.000000000  | 0.000000000  | -0.702021000 |    |              |              |              |
| 6                                     | 0.000000000  | 0.000000000  | 0.702021000  |    |              |              |              |
| 6                                     | -1.262087000 | -0.090083000 | 1.408315000  |    |              |              |              |
| 6                                     | -2.511255000 | -0.068297000 | 0.711351000  |    |              |              |              |
| 6                                     | -2.511255000 | 0.068297000  | -0.711351000 |    |              |              |              |
| 6                                     | -1.262087000 | 0.090083000  | -1.408315000 |    |              |              |              |
| 6                                     | -1.573782000 | -0.246847000 | 2.795330000  |    |              |              |              |
| 6                                     | -3.562011000 | -0.188269000 | 1.652248000  |    |              |              |              |
| 6                                     | -3.562011000 | 0.188269000  | -1.652248000 |    |              |              |              |
| 6                                     | -1.573782000 | 0.246847000  | -2.795330000 |    |              |              |              |
| 6                                     | 1.573782000  | -0.246847000 | -2.795330000 |    |              |              |              |
| 6                                     | 3.562011000  | -0.188269000 | -1.652248000 |    |              |              |              |
| 6                                     | 3.562011000  | 0.188269000  | 1.652248000  |    |              |              |              |
| 6                                     | 1.573782000  | 0.246847000  | 2.795330000  |    |              |              |              |
| 6                                     | -2.974005000 | -0.319842000 | 2.927853000  |    |              |              |              |
| 6                                     | -2.974005000 | 0.319842000  | -2.927853000 |    |              |              |              |
| 6                                     | 2.974005000  | -0.319842000 | -2.927853000 |    |              |              |              |
| 6                                     | 2.974005000  | 0.319842000  | 2.927853000  |    |              |              |              |
| 1                                     | -4.619063000 | 0.219694000  | -1.426805000 |    |              |              |              |
| 1                                     | -3.507238000 | 0.461020000  | -3.858719000 |    |              |              |              |
| 1                                     | -0.879530000 | 0.360953000  | -3.610156000 |    |              |              |              |
| 1                                     | 0.879530000  | -0.360953000 | -3.610156000 |    |              |              |              |
| 1                                     | 3.507238000  | -0.461020000 | -3.858719000 |    |              |              |              |
| 1                                     | 4.619063000  | -0.219694000 | -1.426805000 |    |              |              |              |
| 1                                     | -0.879530000 | -0.360953000 | 3.610156000  |    |              |              |              |
| 1                                     | 0.879530000  | 0.360953000  | 3.610156000  |    |              |              |              |
| 1                                     | 3.507238000  | 0.461020000  | 3.858719000  |    |              |              |              |
| 1                                     | 4.619063000  | 0.219694000  | 1.426805000  |    |              |              |              |
| 1                                     | -3.507238000 | -0.461020000 | 3.858719000  |    |              |              |              |
| 1                                     | -4.619063000 | -0.219694000 | 1.426805000  |    |              |              |              |
| 3                                     | 2.425823000  | 1.519503000  | -2.091288000 |    |              |              |              |
| 3                                     | -2.425823000 | 1.519503000  | 2.091288000  |    |              |              |              |
| 3                                     | 2.425823000  | -1.519503000 | 2.091288000  |    |              |              |              |
| 3                                     | -2.425823000 | -1.519503000 | -2.091288000 |    |              |              |              |
| 1a                                    |              |              |              | 1b |              |              |              |
| 14                                    | 1.120413799  | 4.020518320  | 0.722255923  | 14 | 0.932486000  | 4.022134000  | -0.304545000 |
| 14                                    | 4.725136689  | 2.397351485  | -0.785010086 | 14 | -1.131802000 | 4.957624000  | 0.605978000  |
| 14                                    | -1.120413799 | -4.020518320 | 0.722255923  | 14 | -0.932486000 | -4.022134000 | -0.304545000 |
| 14                                    | -0.743721980 | 5.255311339  | 1.438836934  | 14 | 4.675314000  | -1.990844000 | 0.090950000  |
| 14                                    | 0.743721980  | -5.255311339 | 1.438836934  | 14 | -4.315540000 | -2.849104000 | -0.377889000 |
| 14                                    | -4.382358410 | 2.969862196  | -0.758198583 | 14 | -4.675314000 | 1.990844000  | 0.090950000  |
| 14                                    | -4.725136689 | -2.397351485 | -0.785010086 | 14 | 4.315540000  | 2.849104000  | -0.377889000 |
| 14                                    | 4.382358410  | -2.969862196 | -0.758198583 | 14 | 1.131802000  | -4.957624000 | 0.605978000  |
| 6                                     | 0.800022908  | 1.215785723  | 0.008584921  | 6  | -0.167458000 | 1.413440000  | 0.227018000  |
| 6                                     | 1.426487823  | -0.084993440 | -0.169833581 | 6  | -1.267654000 | 0.537407000  | 0.224444000  |
| 6                                     | -0.647798607 | 1.291731761  | 0.021117421  | 6  | 1.131802000  | 0.862664000  | 0.206746000  |
| 6                                     | 0.647798607  | -1.291731761 | 0.021117421  | 6  | -1.131802000 | -0.862664000 | 0.206746000  |
| 6                                     | -1.426487823 | 0.084993440  | -0.169833581 | 6  | 1.267654000  | -0.537407000 | 0.224444000  |
| 6                                     | -0.800022908 | -1.215785723 | 0.008584921  | 6  | 0.167458000  | -1.413440000 | 0.227018000  |
| 6                                     | 1.621283254  | 2.368951658  | 0.079504922  | 6  | -0.400075000 | 2.788401000  | -0.000798000 |
| 6                                     | 2.814697447  | -0.170687547 | -0.465515584 | 6  | -2.540230000 | 1.090638000  | 0.006629000  |

|    |              |              |              |    |              |              |              |
|----|--------------|--------------|--------------|----|--------------|--------------|--------------|
| 6  | -1.316194754 | 2.539407416  | 0.145472921  | 6  | 2.299344000  | 1.632637000  | -0.009120000 |
| 6  | 1.316194754  | -2.539407416 | 0.145472921  | 6  | -2.299344000 | -1.632637000 | -0.009120000 |
| 6  | -2.814697447 | 0.170687547  | -0.465515584 | 6  | 2.540230000  | -1.090638000 | 0.006629000  |
| 6  | -1.621283254 | -2.368951658 | 0.079504922  | 6  | 0.400075000  | -2.788401000 | -0.000798000 |
| 6  | 3.546203804  | 1.023410964  | -0.594005585 | 6  | -2.813258000 | 2.472753000  | -0.119406000 |
| 6  | 2.973144407  | 2.231702973  | -0.292268081 | 6  | -1.722719000 | 3.340203000  | -0.101437000 |
| 6  | 0.693564708  | -3.703043629 | 0.636197426  | 6  | -2.439042000 | -3.052466000 | -0.155247000 |
| 6  | -3.546203804 | -1.023410964 | -0.594005585 | 6  | 2.813258000  | -2.472753000 | -0.119406000 |
| 6  | -2.677015127 | 2.578080879  | -0.244751082 | 6  | 3.604907000  | 1.047582000  | -0.163107000 |
| 6  | -3.386567893 | 1.455770443  | -0.565045585 | 6  | 3.736610000  | -0.324114000 | -0.149544000 |
| 6  | -0.693564708 | 3.703043629  | 0.636197426  | 6  | 2.439042000  | 3.052466000  | -0.155247000 |
| 6  | -2.973144407 | -2.231702973 | -0.292268081 | 6  | 1.722719000  | -3.340203000 | -0.101437000 |
| 6  | 3.386567893  | -1.455770443 | -0.565045585 | 6  | -3.736610000 | 0.324114000  | -0.149544000 |
| 6  | 2.677015127  | -2.578080879 | -0.244751082 | 6  | -3.604907000 | -1.047582000 | -0.163107000 |
| 1c |              |              |              | 1d |              |              |              |
| 6  | 0.715317000  | 0.000000000  | 1.069410000  | 6  | 0.136737000  | 0.810551000  | -0.561896000 |
| 6  | -0.714260000 | 0.000000000  | 1.009796000  | 6  | 0.032388000  | -0.576057000 | -0.588789000 |
| 6  | 3.555088000  | 0.000000000  | 0.879566000  | 6  | 2.456797000  | -3.124239000 | 0.208259000  |
| 6  | -3.495925000 | 0.000000000  | 0.884468000  | 6  | 2.973183000  | 2.934913000  | 0.171600000  |
| 14 | 0.334152000  | 0.000000000  | -3.980633000 | 14 | -3.002580000 | -3.177411000 | 0.298132000  |
| 6  | -0.035047000 | 0.000000000  | 5.669669000  | 6  | -1.997958000 | 3.740069000  | 0.224334000  |
| 6  | 1.421038000  | 0.000000000  | -0.144566000 | 14 | 1.203619000  | -4.729644000 | 0.282581000  |
| 6  | 1.460067000  | 0.000000000  | 2.263526000  | 14 | 4.305151000  | -3.242957000 | 0.653603000  |
| 6  | -1.386685000 | 0.000000000  | -0.278435000 | 6  | 1.149453000  | -2.628433000 | -0.188315000 |
| 6  | -1.428220000 | 0.000000000  | 2.220902000  | 6  | 3.294787000  | -1.901080000 | 0.152081000  |
| 6  | 0.772726000  | 0.000000000  | -1.358391000 | 6  | 1.222331000  | -1.275775000 | -0.488102000 |
| 6  | 0.722429000  | 0.000000000  | 3.461327000  | 6  | 2.511539000  | -0.756294000 | -0.236909000 |
| 6  | -0.632364000 | 0.000000000  | -1.455664000 | 6  | 0.405931000  | 3.554378000  | 0.002884000  |
| 6  | -0.702180000 | 0.000000000  | 3.430885000  | 14 | 4.744980000  | 2.998403000  | 0.546065000  |
| 6  | 2.815891000  | 0.000000000  | -0.342480000 | 6  | 3.590622000  | 1.669636000  | 0.116103000  |
| 6  | 2.890777000  | 0.000000000  | 2.094833000  | 6  | 1.562336000  | 2.787439000  | -0.104500000 |
| 6  | -2.810961000 | 0.000000000  | -0.379475000 | 6  | 2.612633000  | 0.662221000  | -0.218458000 |
| 6  | -2.851708000 | 0.000000000  | 2.110356000  | 6  | 1.396954000  | 1.387334000  | -0.382067000 |
| 6  | 1.637997000  | 0.000000000  | -2.453365000 | 6  | -0.049946000 | -3.341571000 | 0.020723000  |
| 6  | 1.145408000  | 0.000000000  | 4.822838000  | 14 | -5.053778000 | -1.957171000 | 0.460919000  |
| 6  | -1.137390000 | 0.000000000  | -2.773153000 | 6  | -1.250420000 | -2.643917000 | -0.097092000 |
| 6  | -1.180609000 | 0.000000000  | 4.774463000  | 6  | -3.501973000 | -1.310880000 | 0.099764000  |
| 6  | 3.043316000  | 0.000000000  | -1.730318000 | 6  | -1.195435000 | -1.225056000 | -0.380145000 |
| 14 | 4.695466000  | 0.000000000  | 2.306733000  | 6  | -2.385192000 | -0.475547000 | -0.214945000 |
| 14 | -4.536915000 | 0.000000000  | -1.141438000 | 14 | -0.576744000 | 5.144600000  | -0.032391000 |
| 14 | -4.627235000 | 0.000000000  | 2.363385000  | 14 | -3.612953000 | 4.475218000  | 0.682426000  |
| 14 | 3.329283000  | 0.000000000  | -3.438163000 | 6  | -0.864823000 | 2.921502000  | -0.130199000 |
| 14 | -2.905719000 | 0.000000000  | -2.745460000 | 14 | -3.444635000 | 2.304652000  | 0.236686000  |
| 14 | 1.722769000  | 0.000000000  | 6.463978000  | 6  | -1.031680000 | 1.555558000  | -0.409865000 |
| 14 | -1.816502000 | 0.000000000  | 6.395405000  | 6  | -2.298911000 | 0.949644000  | -0.225147000 |
| 1e |              |              |              | 1f |              |              |              |
| 6  | 0.215847000  | 0.856567000  | -0.706060000 | 6  | 0.204730000  | 0.859619000  | -0.606432000 |
| 6  | 0.127874000  | -0.532091000 | -0.564764000 | 6  | 0.056807000  | -0.523266000 | -0.623094000 |
| 6  | 2.318917000  | -3.468827000 | 0.260090000  | 6  | 2.400645000  | -3.128734000 | 0.233731000  |
| 6  | 2.934087000  | 3.125522000  | 0.120078000  | 6  | 3.082155000  | 2.910563000  | 0.133533000  |
| 14 | -3.027766000 | -3.090583000 | 0.340783000  | 14 | -3.055406000 | -2.992103000 | 0.365181000  |
| 6  | -2.132246000 | 3.444285000  | 0.180940000  | 14 | -2.346117000 | 3.891529000  | 0.284660000  |
| 14 | 0.914081000  | -4.938877000 | 0.359797000  | 14 | 1.095031000  | -4.687038000 | 0.351263000  |
| 14 | 4.047007000  | -4.131111000 | 0.682002000  | 14 | 4.235080000  | -3.296024000 | 0.699215000  |
| 6  | 1.216877000  | -2.600255000 | -0.084737000 | 6  | 1.109417000  | -2.598861000 | -0.179591000 |
| 14 | 3.856386000  | -1.913413000 | 0.166113000  | 6  | 3.274273000  | -1.931701000 | 0.155193000  |
| 6  | 1.336823000  | -1.237506000 | -0.377500000 | 6  | 1.226419000  | -1.257362000 | -0.510806000 |
| 6  | 2.612961000  | -0.594307000 | -0.248857000 | 6  | 2.529933000  | -0.774228000 | -0.262973000 |
| 6  | 0.336690000  | 3.661890000  | -0.076935000 | 6  | 0.537417000  | 3.595644000  | -0.040408000 |
| 14 | 4.751656000  | 3.272446000  | 0.585472000  | 14 | 4.852712000  | 2.926846000  | 0.521735000  |
| 6  | 3.599345000  | 1.872910000  | 0.067335000  | 6  | 3.669960000  | 1.628311000  | 0.081264000  |
| 6  | 1.528366000  | 2.954543000  | -0.214910000 | 6  | 1.673237000  | 2.795138000  | -0.154117000 |

|    |              |              |              |    |              |              |              |
|----|--------------|--------------|--------------|----|--------------|--------------|--------------|
| 6  | 2.654723000  | 0.826868000  | -0.297489000 | 6  | 2.672929000  | 0.644876000  | -0.261635000 |
| 6  | 1.432320000  | 1.518018000  | -0.522471000 | 6  | 1.479381000  | 1.399412000  | -0.435965000 |
| 6  | -0.049864000 | -3.254722000 | 0.043295000  | 6  | -0.110465000 | -3.264628000 | 0.054061000  |
| 14 | -5.144743000 | -1.479321000 | 0.535674000  | 14 | -5.060822000 | -1.687512000 | 0.546291000  |
| 6  | -1.234066000 | -2.541929000 | -0.058794000 | 6  | -1.289943000 | -2.528694000 | -0.070002000 |
| 6  | -3.464696000 | -1.171330000 | 0.132880000  | 6  | -3.492738000 | -1.119668000 | 0.136346000  |
| 6  | -1.140360000 | -1.128303000 | -0.356825000 | 6  | -1.189355000 | -1.122097000 | -0.386094000 |
| 6  | -2.349314000 | -0.357215000 | -0.220033000 | 6  | -2.357257000 | -0.328431000 | -0.214119000 |
| 14 | -0.880904000 | 5.107616000  | 0.466270000  | 14 | -0.258580000 | 5.244540000  | 0.202652000  |
| 14 | -4.042798000 | 3.544222000  | 0.773941000  | 14 | -4.526922000 | 3.036842000  | 0.601612000  |
| 6  | -0.865159000 | 2.937896000  | -0.318119000 | 6  | -0.757539000 | 3.007722000  | -0.179104000 |
| 6  | -3.018801000 | 2.199174000  | 0.147787000  | 6  | -3.166684000 | 2.094825000  | 0.125839000  |
| 6  | -0.961107000 | 1.585395000  | -0.624244000 | 6  | -0.932228000 | 1.643252000  | -0.440921000 |
| 6  | -2.239723000 | 1.062526000  | -0.293382000 | 6  | -2.223658000 | 1.091316000  | -0.229975000 |
| lg |              |              |              | lh |              |              |              |
| 6  | 0.499217000  | 0.000000000  | 1.004440000  | 6  | 0.184581000  | 0.799072000  | -0.703684000 |
| 6  | -0.911844000 | 0.000000000  | 0.970985000  | 6  | 0.044991000  | -0.580860000 | -0.586986000 |
| 6  | -2.965168000 | 0.000000000  | -2.141569000 | 14 | 2.677320000  | -3.538035000 | 0.384646000  |
| 6  | 3.011093000  | 0.000000000  | -1.641602000 | 6  | 2.976922000  | 2.932828000  | 0.140145000  |
| 6  | -3.092969000 | 0.000000000  | 4.013673000  | 14 | -3.125784000 | -2.999834000 | 0.356054000  |
| 6  | 3.398312000  | 0.000000000  | 3.375585000  | 6  | -2.083141000 | 3.443263000  | 0.194147000  |
| 14 | -4.571164000 | 0.000000000  | -1.100743000 | 14 | 0.659126000  | -4.927605000 | 0.102618000  |
| 14 | -2.609752000 | 0.000000000  | -4.041882000 | 14 | 4.837183000  | -2.627871000 | 0.669902000  |
| 6  | -2.876797000 | 0.000000000  | -0.692789000 | 6  | 1.083633000  | -2.682174000 | -0.102959000 |
| 6  | -1.595363000 | 0.000000000  | -2.632041000 | 6  | 3.461312000  | -1.726103000 | 0.164175000  |
| 6  | -1.501638000 | 0.000000000  | -0.315935000 | 6  | 1.217015000  | -1.321892000 | -0.415051000 |
| 6  | -0.707431000 | 0.000000000  | -1.516082000 | 6  | 2.508521000  | -0.747848000 | -0.233926000 |
| 6  | 3.377972000  | 0.000000000  | 0.972706000  | 6  | 0.421904000  | 3.574444000  | -0.055746000 |
| 14 | 3.276928000  | 0.000000000  | -3.434520000 | 14 | 4.731541000  | 2.981047000  | 0.592087000  |
| 6  | 1.812005000  | 0.000000000  | -2.371437000 | 6  | 3.589177000  | 1.667367000  | 0.091134000  |
| 6  | 2.699738000  | 0.000000000  | -0.228350000 | 6  | 1.575418000  | 2.806452000  | -0.201968000 |
| 6  | 0.694572000  | 0.000000000  | -1.450419000 | 6  | 2.612598000  | 0.669146000  | -0.288582000 |
| 6  | 1.258154000  | 0.000000000  | -0.169947000 | 6  | 1.424347000  | 1.402293000  | -0.518168000 |
| 14 | -4.650023000 | 0.000000000  | 2.883170000  | 6  | -0.195139000 | -3.281619000 | 0.051397000  |
| 14 | -2.841756000 | 0.000000000  | 5.911406000  | 14 | -5.108430000 | -1.669542000 | 0.570638000  |
| 6  | -2.937899000 | 0.000000000  | 2.566858000  | 6  | -1.362579000 | -2.528568000 | -0.048550000 |
| 6  | -1.743657000 | 0.000000000  | 4.554537000  | 6  | -3.538970000 | -1.108220000 | 0.159943000  |
| 6  | -1.552317000 | 0.000000000  | 2.249762000  | 6  | -1.231862000 | -1.127726000 | -0.344958000 |
| 6  | -0.817724000 | 0.000000000  | 3.475039000  | 6  | -2.402555000 | -0.326911000 | -0.195515000 |
| 14 | 4.912906000  | 0.000000000  | 2.059648000  | 14 | -0.751764000 | 4.992052000  | 0.321422000  |
| 14 | 4.106514000  | 0.000000000  | 5.066220000  | 14 | -3.890982000 | 3.632461000  | 0.747935000  |
| 6  | 2.611707000  | 0.000000000  | 2.166303000  | 6  | -0.811690000 | 2.912420000  | -0.275274000 |
| 14 | 1.904511000  | 0.000000000  | 4.758254000  | 6  | -2.968456000 | 2.255683000  | 0.169720000  |
| 6  | 1.210019000  | 0.000000000  | 2.221279000  | 6  | -0.958922000 | 1.564904000  | -0.584483000 |
| 6  | 0.601855000  | 0.000000000  | 3.487449000  | 6  | -2.242903000 | 1.091464000  | -0.262773000 |
| li |              |              |              | lj |              |              |              |
| 6  | 0.087958000  | 0.771422000  | -0.002968000 | 6  | 0.862362000  | 0.000000000  | 1.044351000  |
| 6  | -0.038251000 | -0.609512000 | -0.006805000 | 6  | -0.547635000 | 0.000000000  | 1.052731000  |
| 6  | 2.563857000  | -3.157081000 | 0.006482000  | 14 | -3.573081000 | 0.000000000  | -1.707963000 |
| 6  | 2.999463000  | 2.924330000  | 0.022137000  | 6  | 2.933180000  | 0.000000000  | -2.073497000 |
| 6  | -3.080515000 | -2.609736000 | -0.030544000 | 6  | -3.001338000 | 0.000000000  | 3.743742000  |
| 6  | -1.985241000 | 3.859667000  | -0.010021000 | 6  | 2.993739000  | 0.000000000  | 4.108071000  |
| 14 | 1.926838000  | -4.928688000 | -0.002918000 | 14 | -5.077533000 | 0.000000000  | 0.272722000  |
| 14 | 4.534063000  | -3.165410000 | 0.020158000  | 14 | -2.671340000 | 0.000000000  | -3.877522000 |
| 6  | 1.168549000  | -2.727498000 | -0.002507000 | 6  | -2.696311000 | 0.000000000  | -0.078249000 |
| 6  | 3.355759000  | -1.894929000 | 0.014440000  | 6  | -1.697875000 | 0.000000000  | -2.460426000 |
| 6  | 1.154431000  | -1.338457000 | -0.000112000 | 6  | -1.295650000 | 0.000000000  | -0.134866000 |
| 6  | 2.468593000  | -0.776615000 | 0.010353000  | 6  | -0.740532000 | 0.000000000  | -1.424654000 |
| 6  | 0.418425000  | 3.576628000  | 0.005676000  | 14 | 4.528291000  | 0.000000000  | -0.992395000 |
| 14 | 4.809306000  | 3.002399000  | 0.034614000  | 14 | 2.616859000  | 0.000000000  | -3.963551000 |
| 6  | 3.602530000  | 1.650550000  | 0.023617000  | 6  | 1.567816000  | 0.000000000  | -2.570342000 |
| 6  | 1.560454000  | 2.772242000  | 0.011708000  | 6  | 2.827601000  | 0.000000000  | -0.621872000 |

|    |              |              |              |    |              |              |              |
|----|--------------|--------------|--------------|----|--------------|--------------|--------------|
| 6  | 2.577608000  | 0.632814000  | 0.014082000  | 6  | 0.680090000  | 0.000000000  | -1.460660000 |
| 6  | 1.355634000  | 1.357071000  | 0.007078000  | 6  | 1.454162000  | 0.000000000  | -0.255175000 |
| 14 | -0.326106000 | -3.820289000 | -0.014310000 | 6  | -3.433522000 | 0.000000000  | 1.142281000  |
| 14 | -4.893944000 | -2.555743000 | -0.039517000 | 14 | -3.227079000 | 0.000000000  | 5.542643000  |
| 6  | -1.644743000 | -2.581709000 | -0.021210000 | 6  | -2.718041000 | 0.000000000  | 2.325668000  |
| 6  | -3.596040000 | -1.297016000 | -0.031653000 | 6  | -1.785676000 | 0.000000000  | 4.449510000  |
| 6  | -1.315600000 | -1.183809000 | -0.016494000 | 6  | -1.277833000 | 0.000000000  | 2.242526000  |
| 6  | -2.497653000 | -0.368252000 | -0.022633000 | 6  | -0.686697000 | 0.000000000  | 3.507479000  |
| 14 | -0.494380000 | 5.218011000  | 0.003211000  | 14 | 4.571971000  | 0.000000000  | 3.028344000  |
| 14 | -3.601840000 | 4.718581000  | -0.019046000 | 14 | 2.685171000  | 0.000000000  | 6.014125000  |
| 6  | -0.854476000 | 2.952772000  | -0.004447000 | 6  | 2.868157000  | 0.000000000  | 2.660990000  |
| 14 | -3.493868000 | 2.495746000  | -0.023201000 | 6  | 1.634902000  | 0.000000000  | 4.630157000  |
| 6  | -1.057841000 | 1.571418000  | -0.008943000 | 6  | 1.485178000  | 0.000000000  | 2.318756000  |
| 6  | -2.370559000 | 1.041181000  | -0.018887000 | 6  | 0.720665000  | 0.000000000  | 3.537076000  |
| 1k |              |              |              | 1l |              |              |              |
| 14 | -4.847873000 | -0.890606000 | -0.045279000 | 6  | 0.161351000  | 0.828372000  | -0.011288000 |
| 14 | -4.212178000 | 2.370591000  | -0.397532000 | 6  | -0.008165000 | -0.546191000 | 0.002621000  |
| 14 | -4.465607000 | 0.822431000  | 1.384990000  | 6  | 2.512800000  | -3.171374000 | 0.025039000  |
| 14 | 4.294796000  | 1.266972000  | 0.099422000  | 6  | 3.119148000  | 2.902878000  | -0.036134000 |
| 14 | -3.831806000 | 3.387136000  | -0.124988000 | 6  | -3.119623000 | -2.434371000 | 0.029535000  |
| 14 | 4.166897000  | 3.621338000  | 0.067309000  | 14 | -2.341078000 | 4.035138000  | -0.035622000 |
| 14 | -0.437736000 | 4.662292000  | -0.142600000 | 14 | 1.822058000  | -4.918129000 | 0.044487000  |
| 14 | 5.371986000  | -2.830053000 | 0.212278000  | 14 | 4.474594000  | -3.249164000 | 0.022796000  |
| 6  | -0.824729000 | -0.758917000 | -0.203718000 | 6  | 1.129358000  | -2.699699000 | 0.022419000  |
| 6  | -0.377407000 | 0.554700000  | -0.168972000 | 6  | 3.342838000  | -1.934046000 | 0.010958000  |
| 6  | 0.000756000  | -1.875944000 | -0.149366000 | 6  | 1.160809000  | -1.311008000 | 0.008052000  |
| 6  | 1.050369000  | 0.758476000  | -0.087822000 | 6  | 2.492291000  | -0.790654000 | 0.000641000  |
| 6  | 1.383291000  | -1.764646000 | -0.062592000 | 6  | 0.560636000  | 3.624964000  | -0.038307000 |
| 6  | 1.952362000  | -0.419396000 | -0.032835000 | 14 | 4.930738000  | 2.933614000  | -0.038870000 |
| 6  | -2.137100000 | -1.170718000 | -0.282064000 | 6  | 3.690922000  | 1.612840000  | -0.024625000 |
| 6  | -1.373017000 | 1.559762000  | -0.218577000 | 6  | 1.678299000  | 2.783816000  | -0.032626000 |
| 6  | -0.820918000 | -3.041519000 | -0.181332000 | 6  | 2.643009000  | 0.619495000  | -0.013552000 |
| 6  | 1.505725000  | 2.094413000  | -0.055471000 | 6  | 1.443249000  | 1.374032000  | -0.018915000 |
| 6  | 2.159093000  | -2.982628000 | 0.002722000  | 14 | -0.402435000 | -3.739298000 | 0.036471000  |
| 6  | 3.355632000  | -0.323229000 | 0.056978000  | 14 | -4.930565000 | -2.319817000 | -0.029310000 |
| 6  | -2.763711000 | 1.185273000  | -0.305408000 | 6  | -1.680925000 | -2.454208000 | 0.026056000  |
| 6  | -3.142985000 | -0.194423000 | -0.306551000 | 6  | -3.591663000 | -1.107182000 | 0.017248000  |
| 6  | 2.880214000  | 2.424650000  | 0.016159000  | 6  | -1.305002000 | -1.071928000 | 0.010955000  |
| 6  | 3.550860000  | -2.809000000 | 0.093195000  | 6  | -2.463220000 | -0.214897000 | 0.005315000  |
| 6  | 0.055520000  | -4.121411000 | -0.107965000 | 14 | -0.183799000 | 5.310959000  | -0.052598000 |
| 6  | 1.294016000  | -4.082533000 | -0.038589000 | 14 | -4.595722000 | 3.303579000  | -0.022982000 |
| 6  | -2.219724000 | -2.622099000 | -0.260699000 | 6  | -0.743896000 | 3.043485000  | -0.030249000 |
| 6  | 4.087103000  | -1.539856000 | 0.115308000  | 6  | -3.222951000 | 2.265459000  | -0.016674000 |
| 6  | -0.863179000 | 2.875974000  | -0.178744000 | 6  | -0.952354000 | 1.664926000  | -0.016864000 |
| 6  | 0.491380000  | 3.102803000  | -0.102058000 | 6  | -2.288288000 | 1.188498000  | -0.008879000 |
| 1m |              |              |              | 1n |              |              |              |
| 6  | 0.182620000  | 0.868919000  | -0.741050000 | 6  | 0.720703000  | 0.000000000  | 1.000000000  |
| 6  | 0.036149000  | -0.518211000 | -0.723691000 | 6  | -0.720703000 | 0.000000000  | 1.000000000  |
| 6  | 2.409163000  | -3.033544000 | 0.285767000  | 6  | 3.557546000  | 0.000000000  | 1.000000000  |
| 14 | 3.239935000  | 3.401494000  | 0.320913000  | 6  | -3.557546000 | 0.000000000  | 1.000000000  |
| 14 | -3.015950000 | -3.023478000 | 0.414916000  | 6  | 0.000000000  | 0.000000000  | -3.649668000 |
| 6  | -2.186085000 | 3.408400000  | 0.216857000  | 6  | 0.000000000  | 0.000000000  | 5.649668000  |
| 14 | 1.136984000  | -4.632368000 | 0.358173000  | 6  | 1.434674000  | 0.000000000  | -0.239629000 |
| 14 | 4.229331000  | -3.127144000 | 0.823715000  | 6  | 1.434674000  | 0.000000000  | 2.239629000  |
| 6  | 1.121580000  | -2.564749000 | -0.192811000 | 6  | -1.434674000 | 0.000000000  | -0.239629000 |
| 6  | 3.250048000  | -1.815627000 | 0.192200000  | 6  | -1.434674000 | 0.000000000  | 2.239629000  |
| 6  | 1.209009000  | -1.231376000 | -0.575717000 | 6  | 0.711523000  | 0.000000000  | -1.426340000 |
| 6  | 2.483228000  | -0.700431000 | -0.293840000 | 6  | 0.711523000  | 0.000000000  | 3.426340000  |
| 6  | 0.315422000  | 3.608025000  | -0.023095000 | 6  | -0.711523000 | 0.000000000  | -1.426340000 |
| 14 | 5.256432000  | 2.132809000  | 0.582563000  | 6  | -0.711523000 | 0.000000000  | 3.426340000  |
| 6  | 3.716988000  | 1.534072000  | 0.113258000  | 6  | 2.865897000  | 0.000000000  | -0.230680000 |
| 6  | 1.501235000  | 2.893813000  | -0.162611000 | 6  | 2.865897000  | 0.000000000  | 2.230680000  |

|    |              |              |              |    |              |             |              |
|----|--------------|--------------|--------------|----|--------------|-------------|--------------|
| 6  | 2.613496000  | 0.722458000  | -0.281694000 | 6  | -2.865897000 | 0.000000000 | -0.230680000 |
| 6  | 1.431662000  | 1.482512000  | -0.492744000 | 6  | -2.865897000 | 0.000000000 | 2.230680000  |
| 6  | -0.093095000 | -3.238791000 | 0.062248000  | 6  | 1.164617000  | 0.000000000 | -2.782632000 |
| 14 | -5.031072000 | -1.748862000 | 0.655301000  | 6  | 1.164617000  | 0.000000000 | 4.782632000  |
| 6  | -1.279614000 | -2.528188000 | -0.089359000 | 6  | -1.164617000 | 0.000000000 | -2.782632000 |
| 6  | -3.494170000 | -1.161836000 | 0.163334000  | 6  | -1.164617000 | 0.000000000 | 4.782632000  |
| 6  | -1.211639000 | -1.125509000 | -0.454529000 | 14 | 4.547305000  | 0.000000000 | -0.698791000 |
| 6  | -2.392545000 | -0.360347000 | -0.256706000 | 14 | 4.547305000  | 0.000000000 | 2.698791000  |
| 14 | -0.913349000 | 5.008503000  | 0.244151000  | 14 | -4.547305000 | 0.000000000 | -0.698791000 |
| 14 | -4.003930000 | 3.515454000  | 0.760106000  | 14 | -4.547305000 | 0.000000000 | 2.698791000  |
| 6  | -0.900437000 | 2.928063000  | -0.255880000 | 14 | 1.774266000  | 0.000000000 | -4.412134000 |
| 6  | -3.027064000 | 2.188686000  | 0.157307000  | 14 | -1.774266000 | 0.000000000 | -4.412134000 |
| 6  | -0.989534000 | 1.585615000  | -0.605228000 | 14 | 1.774266000  | 0.000000000 | 6.412134000  |
| 6  | -2.262386000 | 1.061727000  | -0.304515000 | 14 | -1.774266000 | 0.000000000 | 6.412134000  |
| lo |              |              |              |    |              |             |              |
| 6  | 0.711231000  | 0.000000000  | 1.000000000  |    |              |             |              |
| 6  | -0.711231000 | 0.000000000  | 1.000000000  |    |              |             |              |
| 6  | -2.980127000 | 0.000000000  | -1.978810000 |    |              |             |              |
| 6  | 2.980127000  | 0.000000000  | -1.978810000 |    |              |             |              |
| 6  | -2.980127000 | 0.000000000  | 3.978810000  |    |              |             |              |
| 6  | 2.980127000  | 0.000000000  | 3.978810000  |    |              |             |              |
| 14 | -4.510291000 | 0.000000000  | -0.821611000 |    |              |             |              |
| 14 | -2.756949000 | 0.000000000  | -3.885519000 |    |              |             |              |
| 6  | -2.794126000 | 0.000000000  | -0.535130000 |    |              |             |              |
| 6  | -1.640915000 | 0.000000000  | -2.549437000 |    |              |             |              |
| 6  | -1.395662000 | 0.000000000  | -0.251516000 |    |              |             |              |
| 6  | -0.704063000 | 0.000000000  | -1.481605000 |    |              |             |              |
| 14 | 4.510291000  | 0.000000000  | -0.821611000 |    |              |             |              |
| 14 | 2.756949000  | 0.000000000  | -3.885519000 |    |              |             |              |
| 6  | 1.640915000  | 0.000000000  | -2.549437000 |    |              |             |              |
| 6  | 2.794126000  | 0.000000000  | -0.535130000 |    |              |             |              |
| 6  | 0.704063000  | 0.000000000  | -1.481605000 |    |              |             |              |
| 6  | 1.395662000  | 0.000000000  | -0.251516000 |    |              |             |              |
| 14 | -4.510291000 | 0.000000000  | 2.821611000  |    |              |             |              |
| 14 | -2.756949000 | 0.000000000  | 5.885519000  |    |              |             |              |
| 6  | -2.794126000 | 0.000000000  | 2.535130000  |    |              |             |              |
| 6  | -1.640915000 | 0.000000000  | 4.549437000  |    |              |             |              |
| 6  | -1.395662000 | 0.000000000  | 2.251516000  |    |              |             |              |
| 6  | -0.704063000 | 0.000000000  | 3.481605000  |    |              |             |              |
| 14 | 4.510291000  | 0.000000000  | 2.821611000  |    |              |             |              |
| 14 | 2.756949000  | 0.000000000  | 5.885519000  |    |              |             |              |
| 6  | 2.794126000  | 0.000000000  | 2.535130000  |    |              |             |              |
| 6  | 1.640915000  | 0.000000000  | 4.549437000  |    |              |             |              |
| 6  | 1.395662000  | 0.000000000  | 2.251516000  |    |              |             |              |
| 6  | 0.704063000  | 0.000000000  | 3.481605000  |    |              |             |              |
